# Supplementary material
Source: publisher figshare collection journal article supplement (https://acs.figshare.com/ndownloader/files/4043797)
Supplement: Supplementary file 1 [file 4043797]

## Supporting Information for:

### Kinetic Mechanism of Translocation and dNTP Binding in Individual DNA Polymerase Complexes

Kate R. Lieberman, Joseph M. Dahl, Ai H. Mai, Ashley Cox,  
Mark Akeson and Hongyun Wang

#### *Supporting Information Text*

#### **Derivation of $1/\langle\Delta T_{\text{post}}\rangle$ at high [dGTP]**

As shown in Figure 3B, the transition rates between the two post-translocation states are  $k_{\text{on}}[\text{dGTP}]$  and  $k_{\text{off}}$ . The time scale of relaxing to the equilibrium between two states is given by the reciprocal of the sum of the transition rates. At high dGTP concentration,  $k_{\text{on}}[\text{dGTP}] + k_{\text{off}}$  is large and as a result, the two post-translocation states are effectively in equilibrium. Thus, we treat the two post-translocation states as one composite state with the probability of each sub-state given by

$$p_{\text{E-DNA}} = k_{\text{off}} / (k_{\text{on}}[\text{dGTP}] + k_{\text{off}})$$

$$p_{\text{E-DNA-dNTP}} = k_{\text{on}}[\text{dGTP}] / (k_{\text{on}}[\text{dGTP}] + k_{\text{off}})$$

The overall transition rate from the composite post-translocation state to the pre-translocation state is

$$\begin{aligned} r_{\text{post-pre}} &= r_4 p_{\text{E-DNA-dNTP}} + r_2 p_{\text{E-DNA}} \\ &= (r_4 k_{\text{on}}[\text{dGTP}] + r_2 k_{\text{off}}) / (k_{\text{on}}[\text{dGTP}] + k_{\text{off}}) \\ &= r_4 + (r_2 - r_4) k_{\text{off}} / (k_{\text{on}}[\text{dGTP}] + k_{\text{off}}) \\ &= r_4 + (r_2 - r_4) K_{\text{d}} / [\text{dGTP}] - (r_2 - r_4) K_{\text{d}}^2 / [\text{dGTP}]^2 + \text{O}(1/[\text{dGTP}]^3) \\ &\approx r_4 + \alpha / [\text{dGTP}] \end{aligned}$$

where  $K_{\text{d}} = k_{\text{off}} / k_{\text{on}}$  and  $\alpha = (r_2 - r_4) K_{\text{d}}$ .

In the measured time traces of ionic current amplitude, the composite post-translocation state is detected as the lower amplitude state since the two post-translocation states yield the same amplitude level.

The mean dwell time of the composite post-translocation state satisfies

$$1/\langle \Delta T_{\text{post}} \rangle = r_{\text{post-pre}} \approx r_4 + \alpha/[dGTP]$$

### The three-state model and the method for estimating transition rates from measured time traces of amplitude

As shown in Figure 3, the 3 states are

State 1: pre-translocation state (upper amplitude)

State 2: post-translocation state (lower amplitude)

State 2B: post-translocation state with dGTP bound (lower amplitude)

Based on the analysis shown in Figure 4, we eliminated the direct transitions between the pre-translocation state and the dGTP bound post-translocation state ( $r_3[dGTP]$  and  $r_4$  in Figure 3B). Thus, the 3-state model becomes the one shown in Figure 3C where the dGTP can only bind when the complex is in the post-translocation state. The 3 states are connected by 4 transition rates

$r_1$ : transition rate from state 1 to state 2

$r_2$ : transition rate from state 2 to state 1

$k_{on}$ : first order rate constant of dGTP binding

$k_{off}$ : rate of dGTP dissociating

At equilibrium, the probabilities of 3 states satisfy

$$p_1 + p_2 + p_{2B} = 1$$

$$\frac{p_{2B}}{p_2} = \frac{[dGTP]}{K_d}, \quad K_d = \frac{k_{off}}{k_{on}}$$

$$\frac{p_1}{p_2} = \frac{r_2}{r_1}$$

Solving these equations, we obtain

$$p_1 = \frac{\frac{r_2}{r_1}}{1 + \frac{[dGTP]}{K_d} + \frac{r_2}{r_1}}$$

$$p_2 = \frac{1}{1 + \frac{[dGTP]}{K_d} + \frac{r_2}{r_1}}$$

$$p_{2B} = \frac{\frac{[dGTP]}{K_d}}{1 + \frac{[dGTP]}{K_d} + \frac{r_2}{r_1}}$$

Below we derive a method for estimating the 4 transition rates from data at individual values of voltage and [dGTP].

The two post-translocation states (states 2 and 2B) yield the same current amplitude. The measured time traces of amplitude show only two amplitude levels:

$I_1$ : the true amplitude of the pre-translocation state (without noise)

$I_2$ : the true amplitude of the two post-translocation states (without noise)

Note that  $I_1$  is the upper amplitude and  $I_2$  is the lower amplitude:  $I_2 < I_1$ .

Let

$S(t)$ : state (1, 2, or 2B) of the complex atop of the pore at time  $t$

$I(t)$ : the *true* amplitude (without noise) at time  $t$ , corresponding to state  $S(t)$ .

$X(t)$ : measured time trace of amplitude =  $I(t)$  + noise

We have

$$I(t) = \begin{cases} I_1, & S(t) = 1 \\ I_2, & S(t) = 2 \text{ or } 2B \end{cases}$$

$$X(t) = I(t) + N(t)$$

Note that  $S(t)$ ,  $I(t)$  and  $X(t)$  are all random processes.

We assume that the noise  $N(t)$  has zero mean and that  $N(t_1)$  is independent of  $N(t_2)$ .

We map  $[I_2, I_1]$  to  $[-1, 1]$  and consider the scaled amplitude

$$Y(t) = \frac{2}{(I_1 - I_2)} \left( X(t) - \frac{I_1 + I_2}{2} \right)$$

The mean of  $Y(t)$  has the theoretical expression

$$E[Y] = p_1 - (p_2 + p_{2B}) = \frac{\frac{r_2}{r_1} - \left( 1 + \frac{[dGTP]}{K_d} \right)}{1 + \frac{[dGTP]}{K_d} + \frac{r_2}{r_1}} \quad (\text{E01})$$

This is the first equation for the unknown parameters.

To derive more equations, we consider the auto-correlation

$$R(t) \equiv E[Y(t_0)Y(t_0 + t)].$$

Form the 3-state model shown in Figure 3C, we can show that the autocorrelation function has two properties:

$$1. \quad R(t) - (E[Y])^2 = \left(1 - (E[Y])^2\right) [c_1 \exp(-\lambda_1 t) + (1 - c_1) \exp(-\lambda_2 t)]$$

where  $\lambda_1$  and  $\lambda_2$  are the eigenvalues of

$$\begin{pmatrix} (r_1 + r_2) & k_{on}[dGTP] \\ r_2 & (k_{on}[dGTP] + k_{off}) \end{pmatrix}$$

This property leads to two equations for the unknown parameters

$$\lambda_1 + \lambda_2 = (r_1 + r_2) + (k_{on}[dGTP] + k_{off}) \quad (E02)$$

$$\begin{aligned} \lambda_1 \cdot \lambda_2 &= (r_1 + r_2)(k_{on}[dGTP] + k_{off}) - r_2 k_{on}[dGTP] \\ &= r_1 k_{off} \left( \frac{r_2}{r_1} + \frac{[dGTP]}{K_d} + 1 \right) \end{aligned} \quad (E03)$$

$$2. \quad R'(0) = -2(r_1 p_1 + r_2 p_2)$$

which gives us another equation for the unknown parameters:

$$\begin{aligned} \left(1 - (E[Y])^2\right) [c_1 \lambda_1 + (1 - c_1) \lambda_2] &= 2r_1 \left( p_1 + \frac{r_2}{r_1} p_2 \right) \\ &= \frac{4r_2}{1 + \frac{[dGTP]}{K_d} + \frac{r_2}{r_1}} \end{aligned} \quad (E04)$$

Thus, we obtain 4 equations for the 4 unknown parameters  $(r_1, r_2, k_{on}, k_{off})$ :

$$\begin{aligned} \frac{\frac{r_2}{r_1} - \left(1 + \frac{[dGTP]}{K_d}\right)}{1 + \frac{[dGTP]}{K_d} + \frac{r_2}{r_1}} &= E[Y] \\ \frac{4r_2}{1 + \frac{[dGTP]}{K_d} + \frac{r_2}{r_1}} &= \left(1 - (E[Y])^2\right) [c_1 \lambda_1 + (1 - c_1) \lambda_2] \\ r_1 k_{off} \left( \frac{r_2}{r_1} + \frac{[dGTP]}{K_d} + 1 \right) &= \lambda_1 \cdot \lambda_2 \end{aligned}$$

$$(r_1 + r_2) + (k_{on}[dGTP] + k_{off}) = \lambda_1 + \lambda_2$$

In the above 4 equations, all quantities on the right hand side are calculated from data.

- $E[Y]$  is calculated directly from a time trace of amplitude  $\{Y(t)\}$ .
- $R(t)$  is calculated directly from a time trace of amplitude  $\{Y(t)\}$ .
- $c_1$ ,  $\lambda_1$  and  $\lambda_2$  are calculated by fitting measured values of  $\{R(t)\}$  to the theoretical expression

$$R(t) - (E[Y])^2 = (1 - (E[Y])^2) [c_1 \exp(-\lambda_1 t) + (1 - c_1) \exp(-\lambda_2 t)].$$

The 4 unknown parameters are then solved from the 4 equations above. In this way, we can calculate a set of 4 parameters from each measured time trace of amplitude. At each individual voltage and [dGTP], we have 20 ~ 60 measured time traces. From multiple estimated sets of parameter values, we use the mean as a more accurate estimate and use the standard error as the error bar.

**Table S1.** Translocation and dNTP binding rates.

| [dGTP] | Voltage | $r_1$ (s <sup>-1</sup> ) <sup>a</sup> | $r_2$ (s <sup>-1</sup> ) <sup>b</sup> | $k_{\text{on}}$ (s <sup>-1</sup> μM <sup>-1</sup> ) <sup>c</sup> | $k_{\text{off}}$ (s <sup>-1</sup> ) <sup>d</sup> |
|--------|---------|---------------------------------------|---------------------------------------|------------------------------------------------------------------|--------------------------------------------------|
| 0 μM   | 140 mV  | 672.94 ± 33.68                        | 1337.9 ± 24.34                        |                                                                  |                                                  |
|        | 150 mV  | 512.32 ± 9.81                         | 1428.8 ± 19.31                        |                                                                  |                                                  |
|        | 160 mV  | 446.8 ± 5.63                          | 1592.8 ± 51.44                        |                                                                  |                                                  |
|        | 170 mV  | 343.31 ± 6.81                         | 1793.5 ± 15.94                        |                                                                  |                                                  |
|        | 180 mV  | 235.71 ± 4.4                          | 1932.9 ± 25.06                        |                                                                  |                                                  |
|        | 190 mV  | 196.16 ± 14.13                        | 1999.2 ± 27.28                        |                                                                  |                                                  |
|        | 200 mV  | 145.09 ± 10.65                        | 2308.2 ± 101.39                       |                                                                  |                                                  |
|        | 210 mV  | 107.9 ± 3.73                          | 2368.7 ± 63.09                        |                                                                  |                                                  |
| 5 μM   | 140 mV  | 678.9 ± 18.1                          | 1327 ± 112                            | 12.99 ± 1.73                                                     | 26.22 ± 2.94                                     |
|        | 150 mV  | 538.1 ± 25.9                          | 1534 ± 101                            | 14.73 ± 1.83                                                     | 27.84 ± 1.80                                     |
|        | 160 mV  | 412.0 ± 21.8                          | 1689 ± 112                            | 15.31 ± 0.98                                                     | 30.29 ± 2.03                                     |
|        | 170 mV  | 324.5 ± 10.1                          | 1765 ± 81                             | 13.04 ± 0.96                                                     | 30.13 ± 1.90                                     |
|        | 180 mV  | 243.0 ± 12.8                          | 2039 ± 128                            | 15.75 ± 1.36                                                     | 34.61 ± 2.41                                     |
|        | 190 mV  | 181.5 ± 14.5                          | 2118 ± 297                            | 13.32 ± 1.15                                                     | 30.01 ± 3.10                                     |
|        | 200 mV  | 137.6 ± 12.3                          | 2205 ± 181                            | 13.12 ± 0.95                                                     | 30.27 ± 1.99                                     |
|        | 210 mV  | 109.7 ± 12.3                          | 2406 ± 306                            | 10.74 ± 1.63                                                     | 27.42 ± 4.81                                     |
| 10 μM  | 140 mV  | 748.5 ± 77.1                          | 1294 ± 264                            | 15.87 ± 4.30                                                     | 26.94 ± 4.71                                     |
|        | 150 mV  | 575.2 ± 54.0                          | 1477 ± 232                            | 18.96 ± 2.78                                                     | 28.20 ± 2.76                                     |
|        | 160 mV  | 420.7 ± 27.7                          | 1653 ± 181                            | 19.19 ± 1.43                                                     | 30.23 ± 1.54                                     |
|        | 170 mV  | 342.2 ± 22.9                          | 1801 ± 166                            | 19.15 ± 1.46                                                     | 30.09 ± 0.77                                     |
|        | 180 mV  | 257.2 ± 10.4                          | 1920 ± 75                             | 20.94 ± 0.95                                                     | 30.55 ± 0.65                                     |
|        | 190 mV  | 202.0 ± 8.7                           | 2100 ± 124                            | 19.61 ± 1.17                                                     | 32.19 ± 1.22                                     |
|        | 200 mV  | 148.0 ± 12.5                          | 2271 ± 318                            | 18.74 ± 1.12                                                     | 29.42 ± 1.22                                     |
|        | 210 mV  | 100.4 ± 7.3                           | 2194 ± 252                            | 21.91 ± 1.19                                                     | 35.52 ± 1.94                                     |

| [dGTP] | Voltage | $r_1$ (s <sup>-1</sup> ) <sup>a</sup> | $r_2$ (s <sup>-1</sup> ) <sup>b</sup> | $k_{\text{on}}$ (s <sup>-1</sup> μM <sup>-1</sup> ) <sup>c</sup> | $k_{\text{off}}$ (s <sup>-1</sup> ) <sup>d</sup> |
|--------|---------|---------------------------------------|---------------------------------------|------------------------------------------------------------------|--------------------------------------------------|
| 20 μM  | 140 mV  | 870.3 ± 120                           | 1137 ± 487                            | 10.20 ± 5.09                                                     | 23.88 ± 4.26                                     |
|        | 150 mV  | 680.0 ± 102                           | 1303 ± 464                            | 12.59 ± 3.95                                                     | 24.07 ± 3.57                                     |
|        | 160 mV  | 474.1 ± 61.9                          | 1556 ± 334                            | 14.57 ± 2.45                                                     | 26.40 ± 1.79                                     |
|        | 170 mV  | 366.8 ± 46.4                          | 1703 ± 359                            | 17.00 ± 1.63                                                     | 29.88 ± 1.88                                     |
|        | 180 mV  | 236.0 ± 15                            | 1931 ± 173                            | 18.81 ± 1.58                                                     | 31.69 ± 0.81                                     |
|        | 190 mV  | 200.2 ± 15.9                          | 2098 ± 195                            | 18.21 ± 0.62                                                     | 29.78 ± 1.18                                     |
|        | 200 mV  | 144.5 ± 12.2                          | 2112 ± 271                            | 17.25 ± 1.07                                                     | 30.29 ± 1.09                                     |
|        | 210 mV  | 102.7 ± 8.6                           | 2349 ± 316                            | 17.49 ± 1.15                                                     | 32.15 ± 1.62                                     |
| 40 μM  | 180 mV  | 227.2 ± 21.8                          | 1765 ± 318                            | 18.01 ± 1.43                                                     | 31.35 ± 1.02                                     |
|        | 190 mV  | 171.5 ± 16.3                          | 1940 ± 312                            | 17.42 ± 1.17                                                     | 31.67 ± 1.39                                     |
|        | 200 mV  | 132.0 ± 9.0                           | 2180 ± 310                            | 19.24 ± 1.09                                                     | 32.35 ± 1.55                                     |
|        | 210 mV  | 87.11 ± 11.5                          | 1985 ± 365                            | 19.79 ± 1.54                                                     | 35.30 ± 2.96                                     |

<sup>a</sup> The rate of transition from the pre-translocation to the post-translocation state.

<sup>b</sup> The rate of transition from the post-translocation to the pre-translocation state.

<sup>c</sup> The dGTP association rate.

<sup>d</sup> The dGTP dissociation rate.

All values are reported with the standard error.
